# Supplementary material
Source: PubMed Central journal article supplement (PMC3887966)
Supplement: molcell-36-6-542-7-supplementary.pdf [file molcell-36-6-542-7-supplementary.pdf]

Supplementary Fig. 1

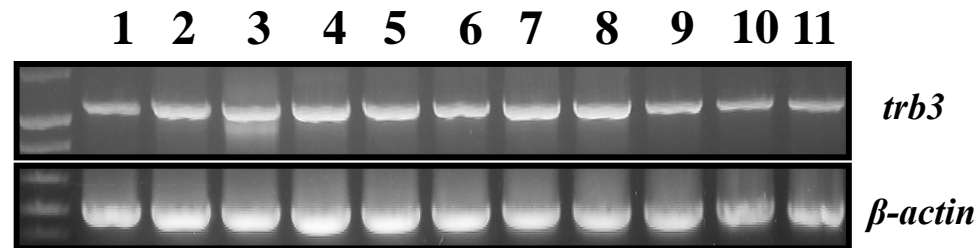

**Supplementary Fig. 1**

RT-PCR analysis of *trb3* transcripts at various embryonic stages of zebrafish.  $\beta$ -actin was used as a reaction control with the same stages. Lane 1. one cell stage, 2. 1k cells, 3. Sphere, 4. 30% epiboly, 5. Shield, 6. 80% epiboly, 7. Tail bud, 8. 16 somite, 9. 24 hpf, 10. 48 hpf, 11. 4 dpf.
